# Supplementary material for: Sipa1 deficiency unleashes a host-immune mechanism eradicating chronic myelogenous leukemia-initiating cells
Source: PubMed Central journal article supplement (PMC5834470; doi:10.1038/s41467-018-03307-8), 2018-03-02
Supplement: 41467_2018_3307_MOESM1_ESM.pdf [file 41467_2018_3307_MOESM1_ESM.pdf]

## **Supplementary Information**

**A potent immune mechanism eradicating chronic myelogenous leukemia–initiating cells uncovered by *Sipa1* deficiency**

**Xu et al.**

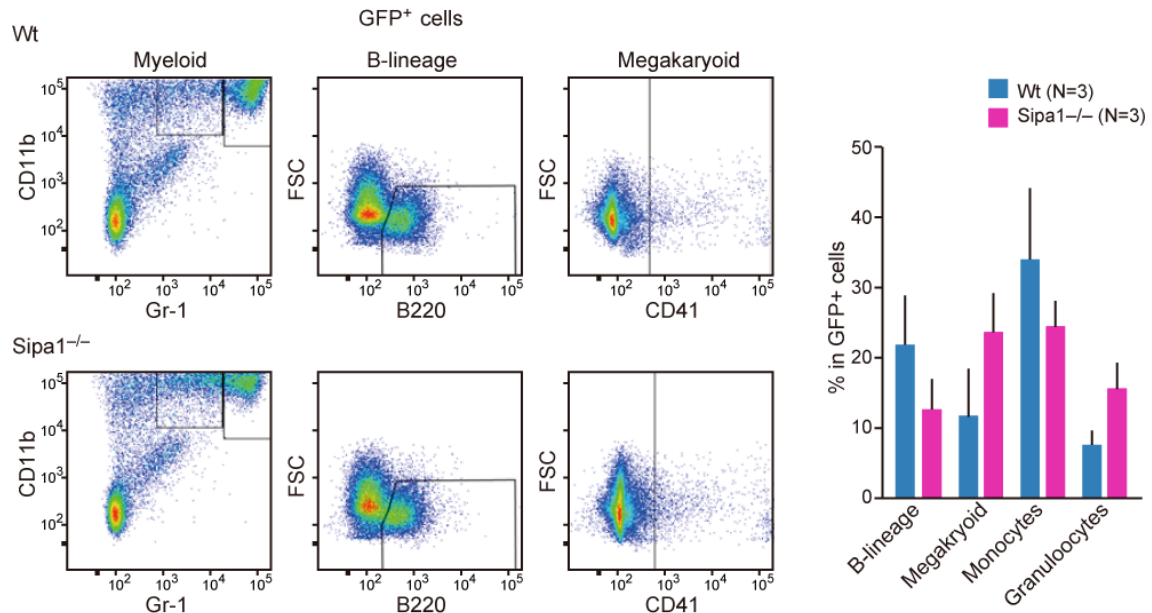

**Supplementary Figure 1. *Bcr-Abl*<sup>+</sup> HPCs show comparable lineage differentiation profiles in Wt and *Sip1*<sup>-/-</sup> mice.** *Bcr-Abl*<sup>+</sup> HPCs were intravenously injected into Wt and *Sip1*<sup>-/-</sup> mice, and 9 days later the BM cells were multi-color analyzed for indicated markers. Representative FACS profiles of myeloid, B-lineage, and megakaryocytes at the GFP<sup>+</sup> cell gate are shown. The means and SEs of the proportions of indicated cell lineages in the GFP<sup>+</sup> population of three mice are also indicated. Similar results were obtained in 3 experiments, and no statistically significant difference of the proportions of differentiated cell lineages was observed between Wt and *Sip1*<sup>-/-</sup> mice.

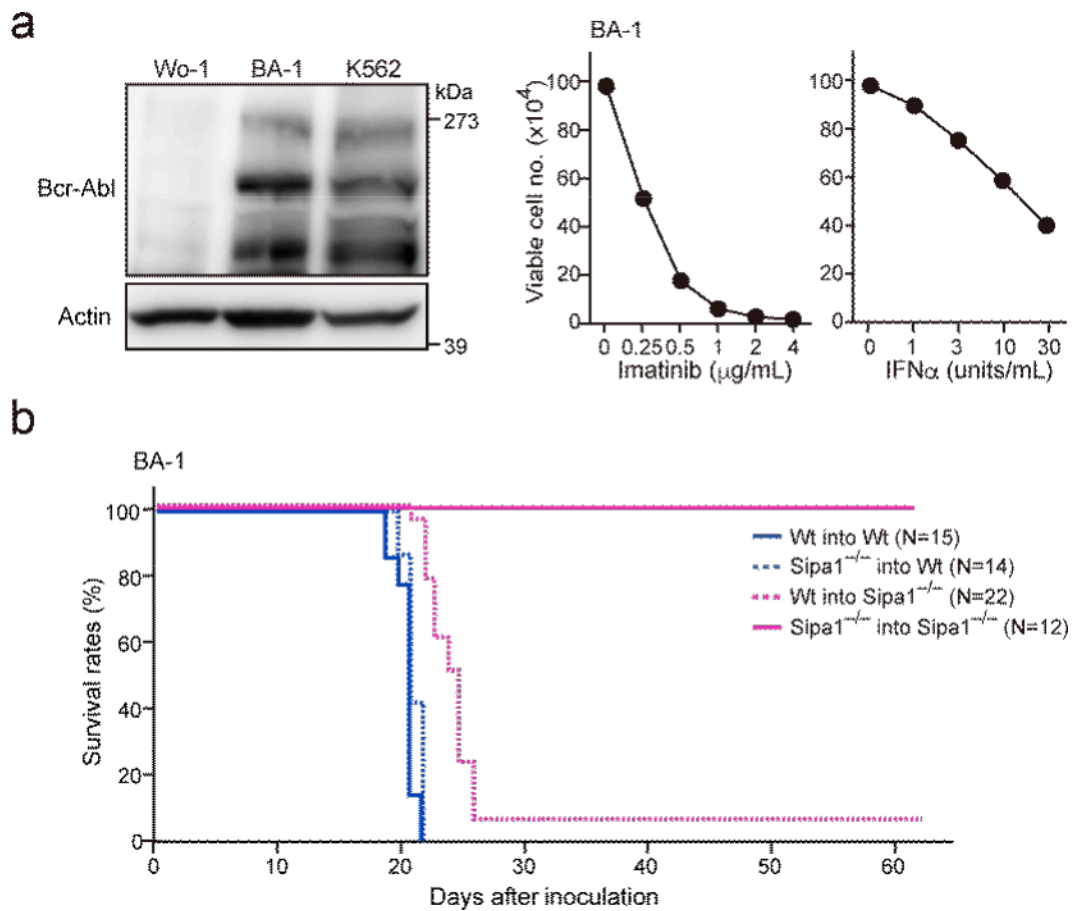

**Supplementary Figure 2. *Sipal*<sup>-/-</sup> mice show resistance to the *Bcr-Abl*<sup>T</sup> leukemia cell line, BA-1, which requires both hematopoietic and non-hematopoietic cell components. (a)** The mouse BA-1 cell line expresses p210Bcr-Abl (Left). Mouse Wo-1 T-ALL and human K562 CML cell lines served as negative and positive controls, respectively. Uncropped images are shown in Supplementary Fig. 10. BA-1 cells were cultured in the presence of varying concentrations of imatinib or IFN- $\alpha$  for 4 days, and the viable cell numbers were counted (right). The means of triplicate cultures are indicated. **(b)** BA-1 cells were intravenously injected into the indicated numbers of BM chimeric mice between Wt and *Sipal*<sup>-/-</sup> mice.

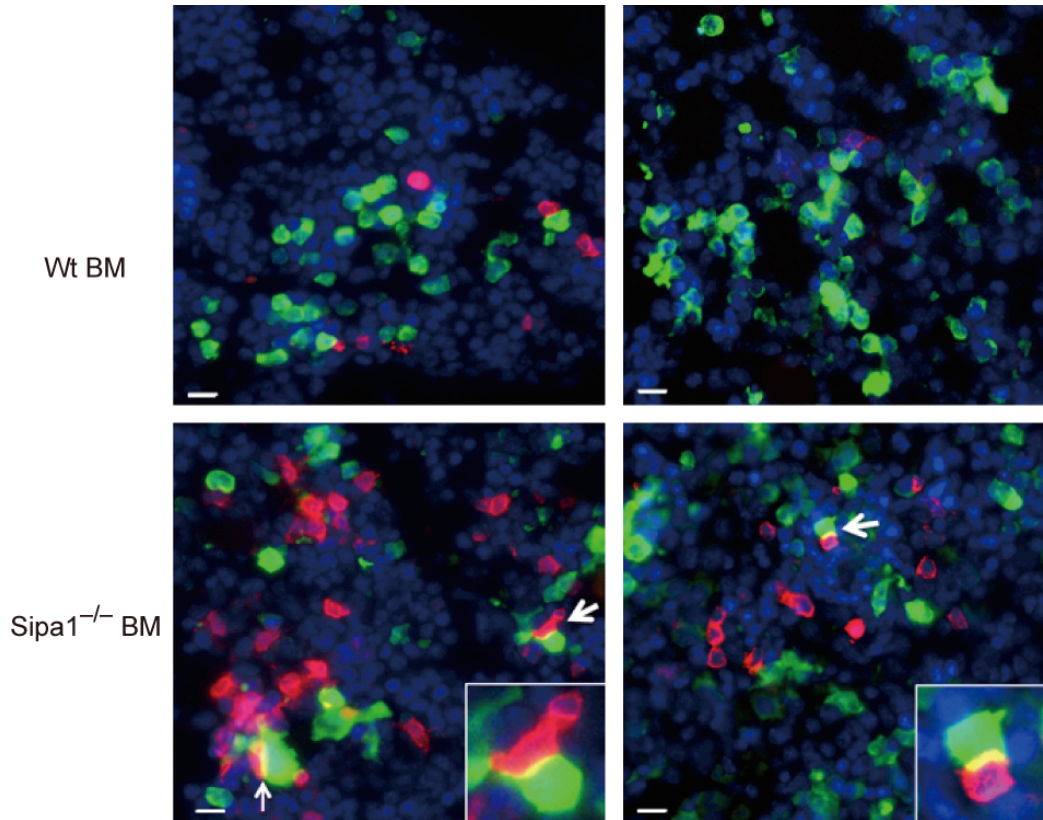

**Supplementary Figure 3. *Bcr-Abl*<sup>+</sup> CML cells in *Sipa1*<sup>-/-</sup> BM are associated with greater numbers of T cells than those in Wt BM.** *Bcr-Abl*<sup>+</sup> HPCs were intravenously injected into Wt and *Sipa1*<sup>-/-</sup> mice, and 9 days later the femoral bones were sectioned, fixed, and two-color immunostained with anti-GFP (green) and anti-CD3 (red) antibodies. Arrows indicate the conjugates of CML and T cells. The enlarged images (thick arrows) are also shown. Scale bars; 10  $\mu$ m. Similar results were obtained in three different samples.

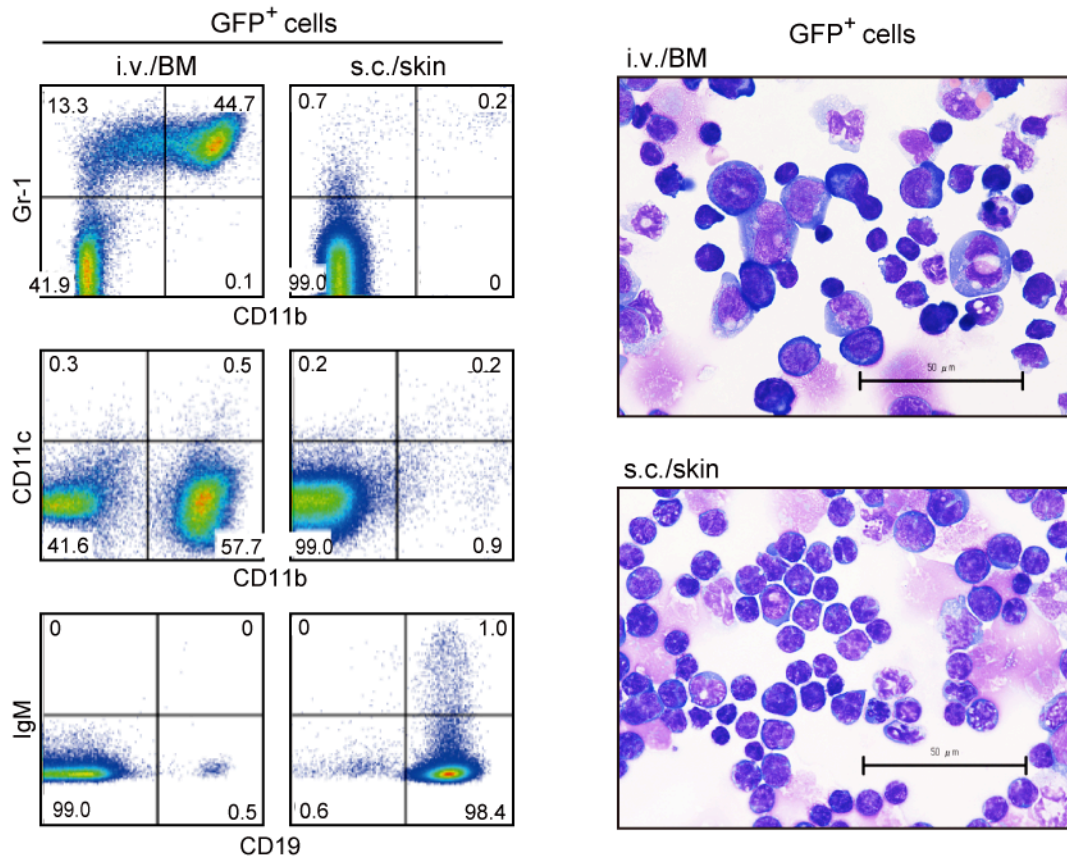

**Supplementary Figure 4. *Bcr-Abl*<sup>+</sup> HPCs robustly proliferate in both BM and subcutaneous tissues of Wt mice with distinct lineage differentiation profiles.** Primary *Bcr-Abl*<sup>+</sup> BM HPCs were injected intravenously (i.v.) or subcutaneously (s.c.) in Matrigel matrix in unirradiated Wt B6 mice. The GFP<sup>+</sup> cells in the BM and subcutaneous tumor, respectively, were FACS-analyzed for differentiation markers of myeloid lineages (CD11b, Gr-1), dendritic cells (CD11c), and B-lineage cells (CD19, IgM) (left). Giemsa-stained pictures confirmed the dominance of immature myeloid cells and erythroblasts in the BM and homogenous lymphoblastic cells in the subcutaneous tumor (right). Scale bars; 50 μm. Essentially similar results were obtained in 5 mice.

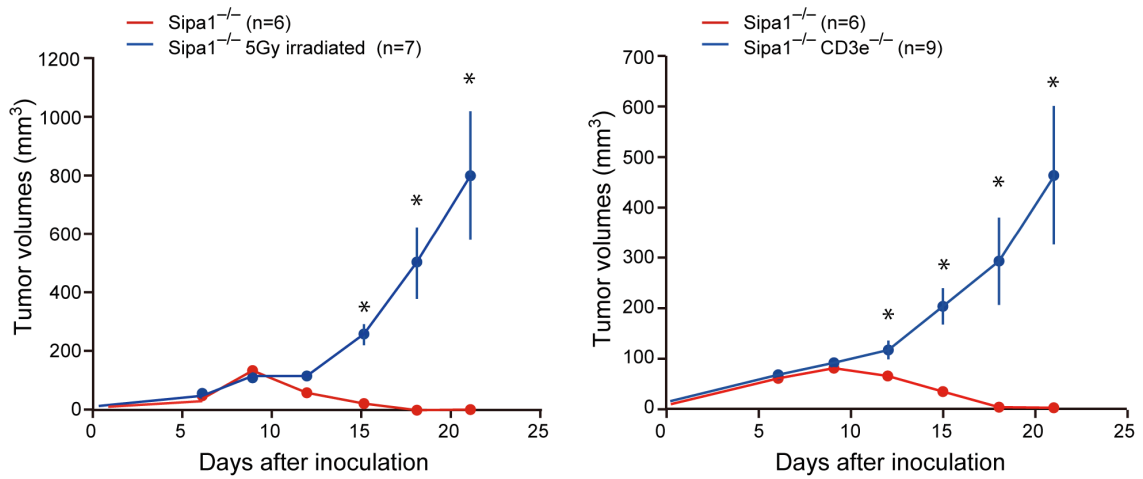

**Supplementary Figure 5. Resistance of *Sipa1*<sup>-/-</sup> mice to subcutaneous *Bcr-Abl*<sup>+</sup> HPCs is also radiosensitive and dependent on T cells.** *Bcr-Abl*<sup>+</sup> HPCs in Matrigel matrix were injected subcutaneously into *Sipa1*<sup>-/-</sup> mice that were untreated, 5Gy-irradiated (left), or at the *Cd3e*<sup>-/-</sup> genetic background (right). The means and SE of the tumor volumes of indicated numbers of mice are indicated. \*;  $p < 0.05$  (two-tailed unpaired Student's *t*-test).

Enrichment plot (19,000 genes)

Mesenchymal lineage genes

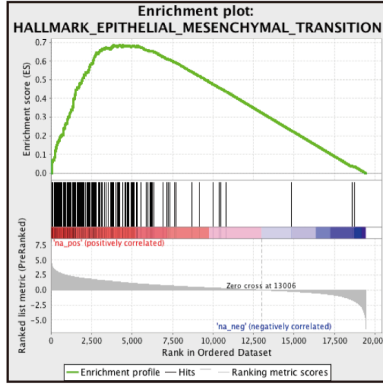

| Genes     | Rank | Score | Genes       | Rank | Score |
|-----------|------|-------|-------------|------|-------|
| 1 MYLK    | 45   | 4.310 | 21 PRRX1    | 477  | 2.921 |
| 2 COL8A2  | 57   | 4.199 | 22 APLP1    | 533  | 2.855 |
| 3 IGFBP3  | 67   | 4.089 | 23 LOX      | 537  | 2.853 |
| 4 ABI3BP  | 69   | 4.077 | 24 TIMP3    | 563  | 2.836 |
| 5 POSTN   | 73   | 4.055 | 25 PTHLH    | 607  | 2.778 |
| 6 EDIL3   | 75   | 4.037 | 26 LRP1     | 693  | 2.700 |
| 7 GJA1    | 133  | 3.683 | 27 ENO2     | 757  | 2.643 |
| 8 COL5A2  | 220  | 3.392 | 28 COL6A2   | 761  | 2.641 |
| 9 COL1A2  | 221  | 3.389 | 29 THBS2    | 763  | 2.638 |
| 10 LAMA1  | 251  | 3.319 | 30 PVR      | 764  | 2.637 |
| 11 BGN    | 252  | 3.317 | 31 LAMA2    | 773  | 2.629 |
| 12 COL3A1 | 262  | 3.304 | 32 IL6      | 819  | 2.592 |
| 13 FN1    | 265  | 3.292 | 33 ADAM12   | 849  | 2.571 |
| 14 NID2   | 295  | 3.227 | 34 PLOD1    | 860  | 2.560 |
| 15 FBN2   | 301  | 3.215 | 35 SERPINE2 | 877  | 2.548 |
| 16 COL6A3 | 340  | 3.137 | 36 WNT5A    | 919  | 2.517 |
| 17 CTHRC1 | 347  | 3.132 | 37 SLIT2    | 980  | 2.467 |
| 18 MATN2  | 398  | 3.048 | 38 SPP1     | 981  | 2.467 |
| 19 PLOD2  | 413  | 3.014 | 39 SDCD     | 989  | 2.464 |
| 20 CDH6   | 435  | 2.985 | 40 LRRC15   | 994  | 2.461 |

ECM/Receptor genes

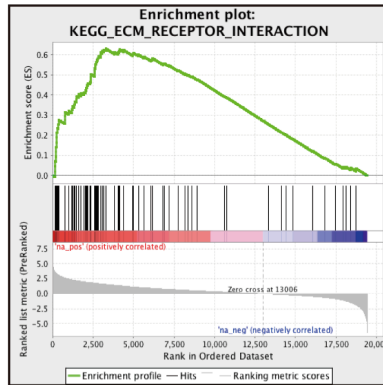

|           |      |       |           |      |       |
|-----------|------|-------|-----------|------|-------|
| 1 ITGB8   | 146  | 3.630 | 21 SDC2   | 1461 | 2.177 |
| 2 ITGA1   | 147  | 3.630 | 22 COL5A3 | 1494 | 2.162 |
| 3 LAMB1   | 152  | 3.610 | 23 ITGB5  | 1592 | 2.114 |
| 4 ITGA8   | 190  | 3.488 | 24 COL6A1 | 1758 | 2.058 |
| 5 COL5A2  | 220  | 3.392 | 25 LAMB3  | 1961 | 1.975 |
| 6 COL1A2  | 221  | 3.389 | 26 HSPG2  | 2036 | 1.951 |
| 7 LAMA1   | 251  | 3.319 | 27 COL4A4 | 2094 | 1.933 |
| 8 COL3A1  | 262  | 3.304 | 28 SDC3   | 2113 | 1.929 |
| 9 FN1     | 265  | 3.292 | 29 COL6A6 | 2176 | 1.907 |
| 10 LAMA4  | 283  | 3.255 | 30 TNXB   | 2313 | 1.859 |
| 11 COL6A3 | 340  | 3.137 | 31 LAMB2  | 2377 | 1.841 |
| 12 ITGA11 | 381  | 3.083 | 32 THBS1  | 2379 | 1.840 |
| 13 COL6A2 | 761  | 2.641 | 33 GP1BB  | 2383 | 1.839 |
| 14 THBS2  | 763  | 2.638 | 34 ITGA9  | 2580 | 1.784 |
| 15 LAMA2  | 773  | 2.629 | 35 COL2A1 | 2582 | 1.784 |
| 16 SPP1   | 981  | 2.467 | 36 COL5A1 | 2584 | 1.783 |
| 17 SDC1   | 1181 | 2.333 | 37 CD44   | 2626 | 1.768 |
| 18 TNC    | 1217 | 2.306 | 38 ITGB1  | 2662 | 1.756 |
| 19 ITGA7  | 1347 | 2.233 | 39 LAMC2  | 2710 | 1.740 |
| 20 COMP   | 1385 | 2.214 | 40 LAMC1  | 2744 | 1.729 |

Collagen genes

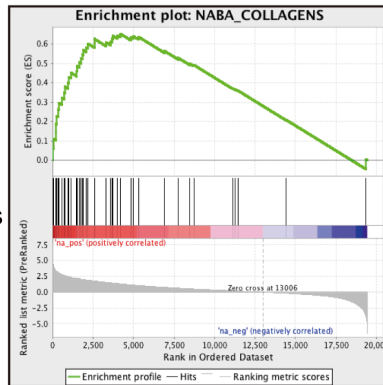

|            |      |       |            |      |       |
|------------|------|-------|------------|------|-------|
| 1 COL6A5   | 18   | 4.838 | 21 COL6A6  | 2176 | 1.907 |
| 2 COL8A2   | 57   | 4.199 | 22 COL2A1  | 2582 | 1.784 |
| 3 COL5A2   | 220  | 3.392 | 23 COL5A1  | 2584 | 1.783 |
| 4 COL1A2   | 221  | 3.389 | 24 COL1A1  | 3300 | 1.569 |
| 5 COL3A1   | 262  | 3.304 | 25 COL28A1 | 3591 | 1.488 |
| 6 COL6A3   | 340  | 3.137 | 26 COL20A1 | 3675 | 1.464 |
| 7 COL8A1   | 402  | 3.039 | 27 COL18A1 | 3732 | 1.449 |
| 8 COL17A1  | 564  | 2.835 | 28 COL4A3  | 4001 | 1.381 |
| 9 COL23A1  | 735  | 2.659 | 29 COL7A1  | 4176 | 1.337 |
| 10 COL6A2  | 761  | 2.641 |            |      |       |
| 11 COL24A1 | 951  | 2.487 |            |      |       |
| 12 COL13A1 | 1016 | 2.444 |            |      |       |
| 13 COL12A1 | 1135 | 2.352 |            |      |       |
| 14 COL5A3  | 1494 | 2.162 |            |      |       |
| 15 COL16A1 | 1528 | 2.149 |            |      |       |
| 16 COL15A1 | 1644 | 2.097 |            |      |       |
| 17 COL6A1  | 1758 | 2.058 |            |      |       |
| 18 COL4A5  | 1853 | 2.019 |            |      |       |
| 19 COL14A1 | 1912 | 1.993 |            |      |       |
| 20 COL4A4  | 2094 | 1.933 |            |      |       |

FGF/Receptor genes

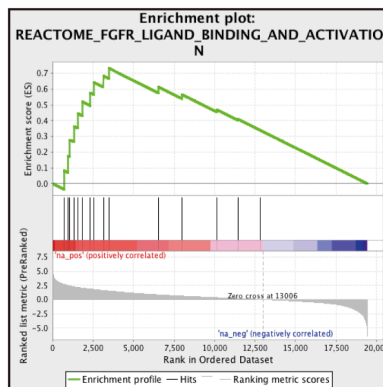

|          |      |       |
|----------|------|-------|
| 1 FGF18  | 701  | 2.687 |
| 2 FGFR1  | 971  | 2.474 |
| 3 KLB    | 1059 | 2.410 |
| 4 FGF1   | 1310 | 2.252 |
| 5 FGF9   | 1558 | 2.131 |
| 6 FGF10  | 1833 | 2.029 |
| 7 FGF2   | 2315 | 1.859 |
| 8 FGFR4  | 2537 | 1.795 |
| 9 FGF7   | 3137 | 1.611 |
| 10 FGF23 | 3475 | 1.521 |

**Supplementary Figure 6. Intratumor MSCs of *Sipa1*<sup>-/-</sup> mice show enhanced expression of selected gene sets compared to those of Wt mice.** MSCs (GFP<sup>-</sup> CD45<sup>-</sup> Ter119<sup>-</sup> CD31<sup>-</sup>) were sorted from the tumors after subcutaneous injection of *Bcr-Abl*<sup>+</sup> HPCs into Wt and *Sipa1*<sup>-/-</sup> mice, and the RNAs were subjected to microarray analysis. Gene set enrichment analysis indicated increased expression of the indicated gene sets in the MSCs of *Sipa1*<sup>-/-</sup> mice. The top 10–40 genes that increased in each gene set are listed. The data is available in the GEO repository, NCBI (GSE108002, <https://www.ncbi.nlm.nih.gov/geo/query/acc.cgi?acc=GSE108002>).



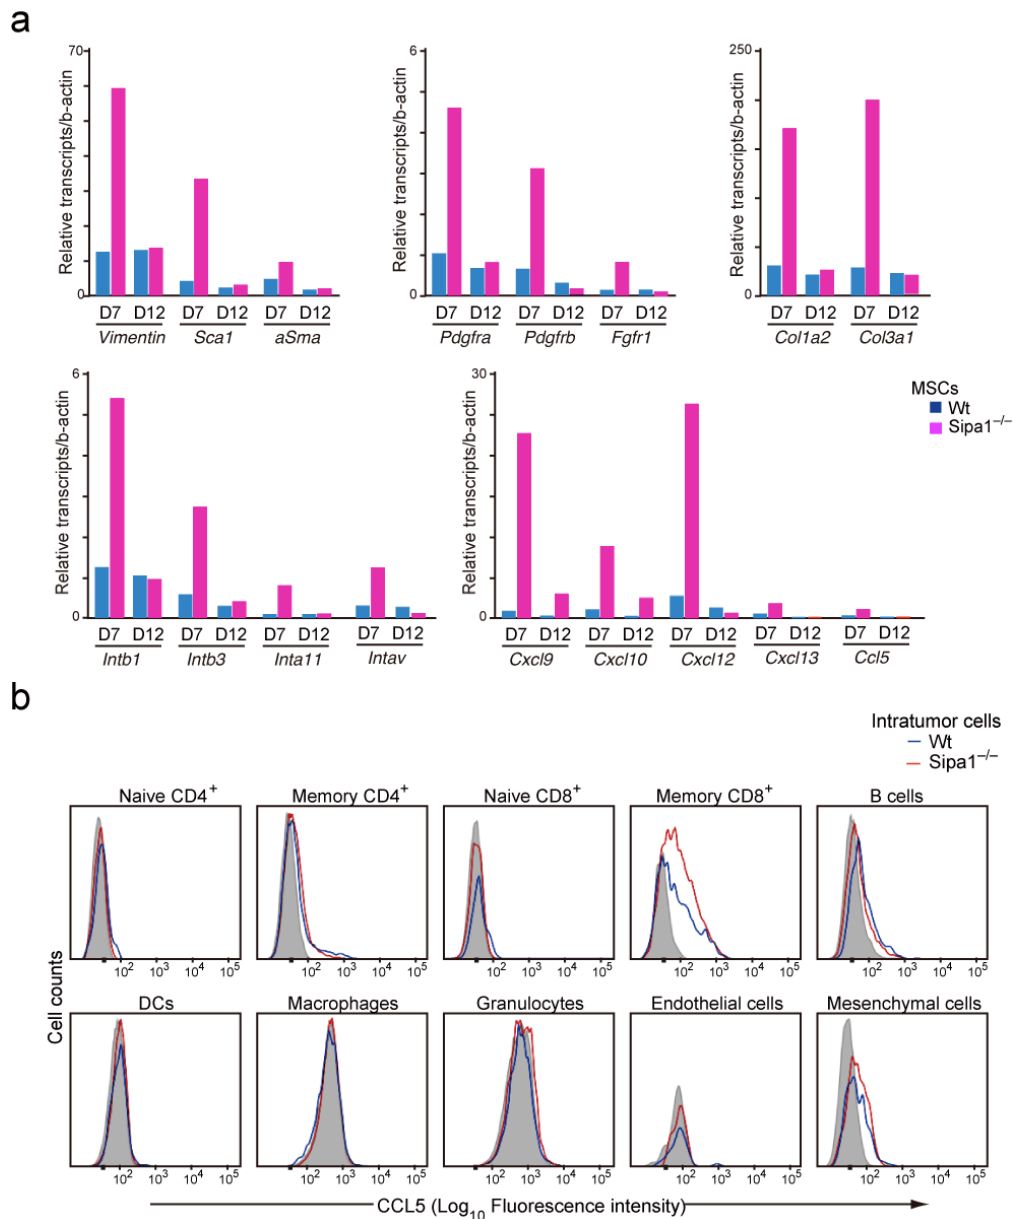

**Supplementary Figure 7. MSCs are activated transiently during the early stage including *Cxcl9*, while *Ccl5* is exclusively produced by memory  $CD8^+$  T cells at later stage in *Bcr-Abl*<sup>+</sup> tumor tissue of *Sip1*<sup>-/-</sup> host. (a) *Bcr-Abl*<sup>+</sup> HPCs were subcutaneously injected in collagen matrix into Wt and *Sip1*<sup>-/-</sup> mice, and the tumor tissues were resected on day 7 and day 12. MSCs (GFP<sup>-</sup> CD45<sup>-</sup> Ter119<sup>-</sup> CD31<sup>-</sup>) were sorted and subjected to quantitative PCR for the indicated genes. Contamination of GFP<sup>+</sup> cells in the sorted cell population was less than 0.5%. Tumors of 3 mice were pooled for one experiment, and similar results were obtained in two independent experiments. (b) Subcutaneous *Bcr-Abl*<sup>+</sup> tumor tissues on day 12 were dispersed into a cell suspension in collagenase and DNase I solution, and the intracellular expression of *Ccl5* was analyzed in the indicated cell populations. Tumors of 3 mice were pooled for one experiment, and similar results were obtained in two independent experiments.**

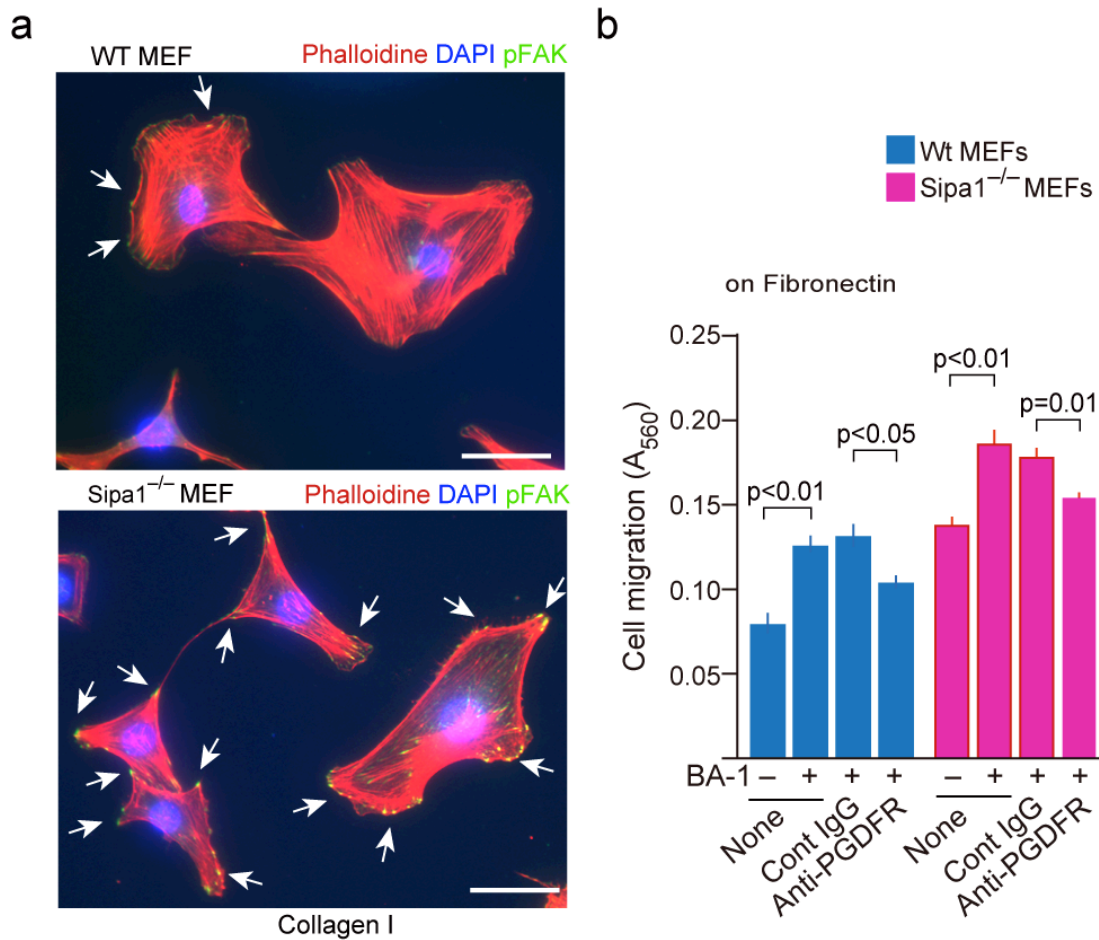

**Supplementary Figure 8. *Sipa1*<sup>-/-</sup> MEFs show a markedly enhanced phosphorylation of FAK on collagen and directed migration to BA-1 cells that is inhibited in the presence of anti-PDGFR antibody.** (a) Wt and *Sipa1*<sup>-/-</sup> MEFs were cultured on collagen I-coated cover slips in the medium containing 0.1% FCS and immunostained with anti-phospho-focal adhesion kinase (p-FAK). Arrows indicate p-FAK<sup>+</sup> focal adhesion sites. Scale bars; 40  $\mu$ m. (b) Directed migration of Wt and *Sipa1*<sup>-/-</sup> MEFs to BA-1 cells were assessed in the presence of fibronectin using the Boyden chamber. Anti-PDGFR $\alpha$  antibody or isotype-matched control IgG was included in the lower chambers with BA-1 cells. Means and SEs of quadruplicate culture are shown, and similar results were obtained in two independent experiments. *p* values; two-tailed unpaired Student's *t*-test.

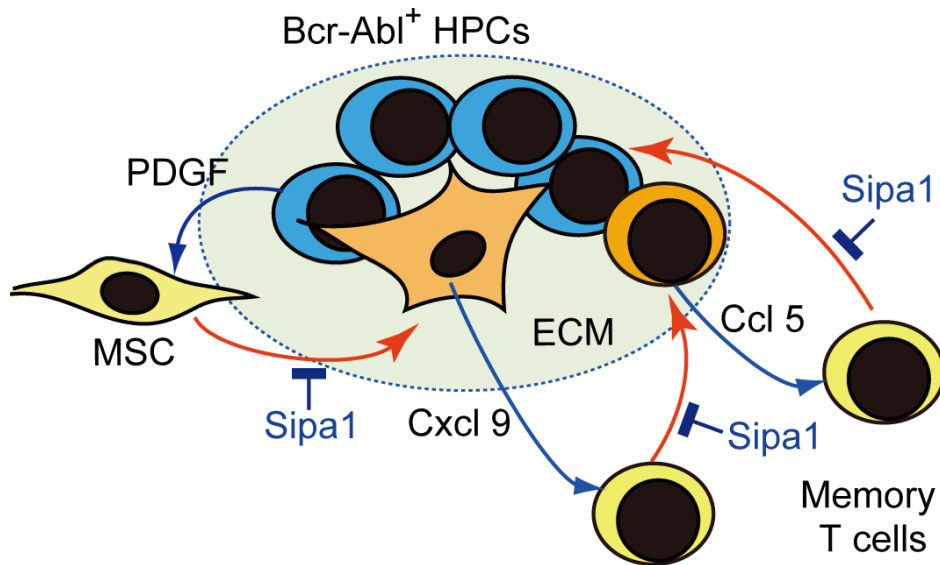

**Supplementary Figure 9. Schematic representation of the interplay between MSCs and T cells in *Bcr-Abl*<sup>+</sup> tumor tissue of *Sipa1*<sup>-/-</sup> host in response to *Bcr-Abl*<sup>+</sup> CML cells.** In the *Sipa1*<sup>-/-</sup> host, MSCs are strongly activated by *Bcr-Abl*<sup>+</sup> cells via PDGF, at least in part, and show enhanced directed migration to the CML cells. Concurrently, the MSCs are activated for gene sets including ECM and the related receptors and also secrete abundant Cxcl9 at the vicinity of CML cells, through which *Sipa1*<sup>-/-</sup> memory T cells that have enhanced chemotactic activity are efficiently recruited inside the tumor tissue. Such recruited T cells, in particular CD8<sup>+</sup> cells, secrete Ccl5, which further amplifies the T cell recruitment to the tumor tissue and may also show potent TCR-costimulatory activity. We propose that such an endogenous cellular interplay in tumor tissue results in the spontaneous eradication of CML disease in *Sipa1*<sup>-/-</sup> host. Blue arrows indicate chemotactic effects, and red arrows show cell activation and migration. Blue “T” marks indicate the negative regulation by endogenous Sipa1.

**Figure 8a**

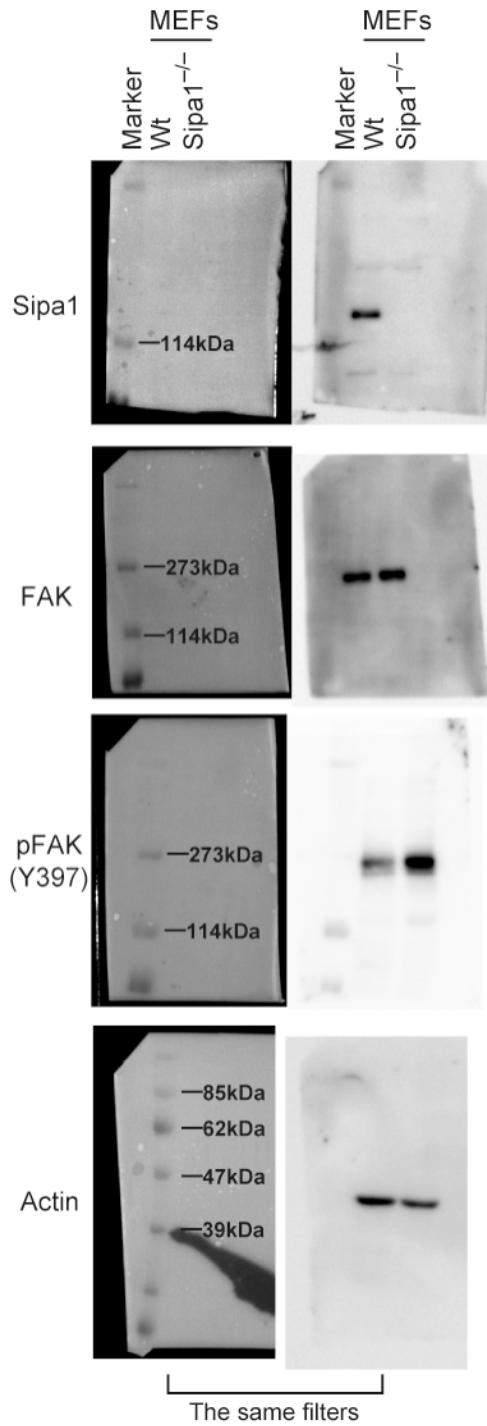

**Supplement. Figure 2a**

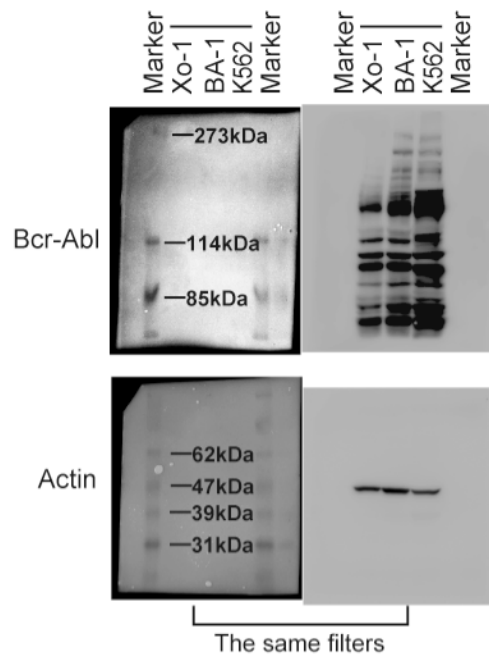

**Supplementary Figure 10. Full scan of blots for figure 8a, and supplementary figure 2a. Prestained molecular markers were used.**

**Supplementary Table 1. Antibodies use for FACS analysis, cell sorting and immunostaining**

| <b>Antibody</b>                       | <b>Clone</b> | <b>Company</b> | <b>Catalogue No.</b> | <b>Used concentration</b> |
|---------------------------------------|--------------|----------------|----------------------|---------------------------|
| <b>FACS analysis and Cell sorting</b> |              |                |                      |                           |
| anti-CD3-PE                           | 145-2C11     | eBioscience    | 12-0031-85           | 1ug/ml                    |
| anti-CD4-PE                           | GK1.5        | eBioscience    | 12-0041-85           | 1ug/ml                    |
| anti-CD8-PE                           | 53-6.7       | eBioscience    | 12-0081-85           | 1ug/ml                    |
| anti-B220-PE                          | RA3-6B2      | eBioscience    | 12-0452-85           | 1ug/ml                    |
| anti-GR1-PE                           | RB6-8C5      | eBioscience    | 12-5931-85           | 1ug/ml                    |
| anti-CD11b-PE                         | M1/70        | eBioscience    | 12-0012-85           | 1ug/ml                    |
| anti-TER119-PE                        | TER-119      | Biologend      | 116208               | 1ug/ml                    |
| anti-CD140a-PE                        | APA5         | Biologend      | 135905               | 1ug/ml                    |
| anti-F4/80-PE                         | BM8          | TONBO          | 50-4801-U100         | 1ug/ml                    |
| anti-CD45-APC                         | 30-F11       | TONBO          | 20-0451-U100         | 1ug/ml                    |
| anti-TER119-APC-Cy7                   | TER119       | Biologend      | 116223               | 1ug/ml                    |
| anti-CD4-APC                          | GK1.5        | Biologend      | 100412               | 1ug/ml                    |
| anti-CD4-PE-Cy7                       | GK1.5        | TONBO          | 60-0041-U100         | 1ug/ml                    |
| anti-CD8a-PE-Cy7                      | 53-6.7       | TONBO          | 60-0081-U101         | 1ug/ml                    |
| anti-CD11b-PE-Cy7                     | M1/70        | TONBO          | 60-0112-U102         | 1ug/ml                    |
| anti-CD62L-PE-Cy7                     | MEL-14       | TONBO          | 60-0621-U103         | 1ug/ml                    |
| anti-CD31-APC                         | 390          | Biologend      | 102410               | 1ug/ml                    |
| anti-CD45R-APC                        | RA3-6B2      | Biologend      | 103226               | 1ug/ml                    |
| anti-CD4-APC-Cy7                      | GK1.5        | Biologend      | 100414               | 1ug/ml                    |
| anti-CD8a-APC-Cy7                     | 53-6.7       | TONBO          | 25-0081-U100         | 1ug/ml                    |
| anti-CD45-APC-Cy7                     | 30-F11       | Biologend      | 103116               | 1ug/ml                    |
| anti-Gr-1-APC-Cy7                     | RB6-8C5      | Biologend      | 108424               | 1ug/ml                    |
| anti-CD11c-Pacific Blue               | N418         | Biologend      | 117322               | 1ug/ml                    |
| anti-TCR $\beta$ -BV421               | H57-597      | Biologend      | 109226               | 1ug/ml                    |
| anti-CD8a-BV510                       | 53-6.7       | BD Bioscience  | 563068               | 1ug/ml                    |
| anti-CD45-BV510                       | 30-F11       | BD Bioscience  | 563891               | 1ug/ml                    |
| anti-TER119-BV510                     | TER-119      | BD Bioscience  | 563995               | 1ug/ml                    |
| anti-Ccl5-PE(RANTES)                  | 2E9/CCL5     | Biologend      | 149103               | 1ug/ml                    |
| <b>Immunostaining</b>                 |              |                |                      |                           |
| anti-CD105                            | MJ7/18       | Biologend      | 102401               | 2.5ug/ml                  |
| anti-GFP                              | Rabbit IgG   | Invitrogen     | A-11122              | 2ug/ml                    |
| anti-vimentin                         | Rabbit       | CST            | 5741                 | x100                      |
| anti-CD11c                            | HL3          | BD Bioscience  | 500283               | 0.125ug/ml                |
| anti-CD3                              | 145-2C11     | Biologend      | 100302               | 2.5ug/ml                  |
| anti-B220                             | RA3-6B2      | BioLegend      | 103202               | 2.5ug/ml                  |

Supplementary Table 2. Primer sets used for qPCR

| Gene name       | Forward primer 5'-3'   | Reverse primer 5'-3'        |
|-----------------|------------------------|-----------------------------|
| <i>Actb</i>     | GGCTGTATTCCCCTCCATCG   | CCAGTTGGTAACAATGCCATGT      |
| <i>aSMA</i>     | CCAGCACCATGAAGATCAAG   | TCCACATCTGCTGGAAGGTA        |
| <i>aSMA-n</i>   | GTCCCAGACATCAGGGAGTAA  | TCGGATACTTCAGCGTCAGGA       |
| <i>Ccl2</i>     | CATCCACGTGTTGGCCA      | GATCATCTTGCTGGTGAATGAGT     |
| <i>Ccl3</i>     | CAAGTCTTCTCAGCGCCATA   | GGAATCTTCCGGCTGTAGG         |
| <i>Ccl5</i>     | CCTACTCCCCTCGGTCCCT    | GCTGATTTCTTGGGTTTGCT        |
| <i>Col1a2</i>   | CACCTGGTCCTGTTGGAAGT   | CACCAGGGAAGCCAGTCA          |
| <i>Col3a1</i>   | GCACAGCAGTCCAACGTAGA   | GACATCTCTAGACTCATAGGACTGACC |
| <i>Col6a5</i>   | GCAATGGCGAGTCTCACTTC   | CTCATGAGCAAGACCCAGTTC       |
| <i>Cxcl1</i>    | AGACTCCAGCCACACTCCAA   | TGACAGCGCAGCTCATTG          |
| <i>Cxcl5</i>    | GGGAAACCATTGTCCCTGA    | TCCGATAGTGTGACAGATAGGAAA    |
| <i>Cxcl9</i>    | CCATGAAGTCCGCTGTTCTT   | TGAGGGATTTGTAGTGGATCG       |
| <i>Cxcl10</i>   | ATCAGCACCATGAACCCAAG   | TTCCCTATGGCCCTCATTCCT       |
| <i>Cxcl11</i>   | GCTGCTGAGATGAACAGGAA   | TTCCCTATGGCCCTCATTCCT       |
| <i>Cxcl12</i>   | CCAAACTGTGCCCTTCAGAT   | ATTTCCGGTCAATGCACACT        |
| <i>Cxcl13</i>   | ATGAGGCTCAGCACAGCA     | ATGGGCTTCCAGAATACCG         |
| <i>Fgfr1</i>    | TCTGGCCTCTACGCTTGC     | GAGGATGGGAGTGCATCTG         |
| <i>Fgf1</i>     | CAGCCTGCCAGTTCTTCAG    | GGCTGCCAAGGTTGTGAT          |
| <i>Fgf2</i>     | CGGCTCTACTGCAAGAACG    | TGCTTGAGTTGTAGTTTGACG       |
| <i>Fgf7</i>     | TGGCTGACACCATGACTAGC   | GGCTACAGGCTGTCGTTTTT        |
| <i>Fgf10</i>    | CGGGACCAAGAATGAAGACT   | GCAACAAC TCCGATTTCCAC       |
| <i>Itga1</i>    | GATGGGGACGTCAACATTCT   | TGTGGTTAAGACGCTACCAAAG      |
| <i>Itga5</i>    | CACCATTCAATTTGACAGCAA  | TCCTCTCCCTTGGCCTGTGA        |
| <i>Itga7</i>    | CGTGCTCTGGACTCTGTGG    | CCCAGCTCACACTCGACAT         |
| <i>Itga8</i>    | TGGAGAATTCACTGGGGACT   | AAGTTCTGTGCTCCTCTTGGA       |
| <i>Itga9</i>    | GACATTGATGATGACGGGTTC  | TGTAGACTGCGCCAGCAA          |
| <i>Itga11</i>   | GCAGACGTCCTCTTTTACCAGA | GAGCTGTTTGCCTTGACCTC        |
| <i>ItgaV</i>    | GGTGTGGATCGAGCTGTCTT   | CAAGGCCAGCATTTACAGTG        |
| <i>Itgb1</i>    | TCAGATCCAACCACAACAGC   | GGTAATCTTCAGCCCTCTTGAA      |
| <i>Itgb3</i>    | GCCATCATGCAGGCTACAG    | AAACACTAGCAAATGGGATGC       |
| <i>Itgb5</i>    | ACCTGCCAAGATGGCATATC   | CACGGACACTTCAAAGGATG        |
| <i>Pdgfa</i>    | GGCTGGCTCGAAGTCAGATC   | CCTCAGCCCCCTACGGAGTCT       |
| <i>Pdgfra</i>   | AAGACCTGGGCAAGAGGAAC   | GAACCTGTCTCGATGGCACT        |
| <i>Pdgfrb</i>   | TGCAGAGACCTCAAAGGTG    | GAAAGTCACATTCGTTTCTAGCTG    |
| <i>Sca-1</i>    | CCTACCCTGATGGAGTCTGTGT | GGCAGATGGGTAAGCAAAGA        |
| <i>Snai1</i>    | CTTGTGTCTGCACGACCTGT   | CAGGAGAATGGCTTCTCACC        |
| <i>Snai2</i>    | ACATTGCCTTGTGTCTGCAA   | GAAAGGCTTTTCCCCAGTGT        |
| <i>Vimentin</i> | CCAACCTTTTCTTCCCTGAAC  | TTGAGTGGGTGTCAACCAGA        |
| <i>Vcam1</i>    | TCTTACCTGTGCGCTGTGAC   | ACTGGATCTTCAGGGAATGAGT      |
